# Supplementary material
Source: MDPI journal article supplement (https://www.mdpi.com/2306-5710/9/4/83)
Supplement: s1 [file s1 › beverages-2592390-supplementary.pdf]

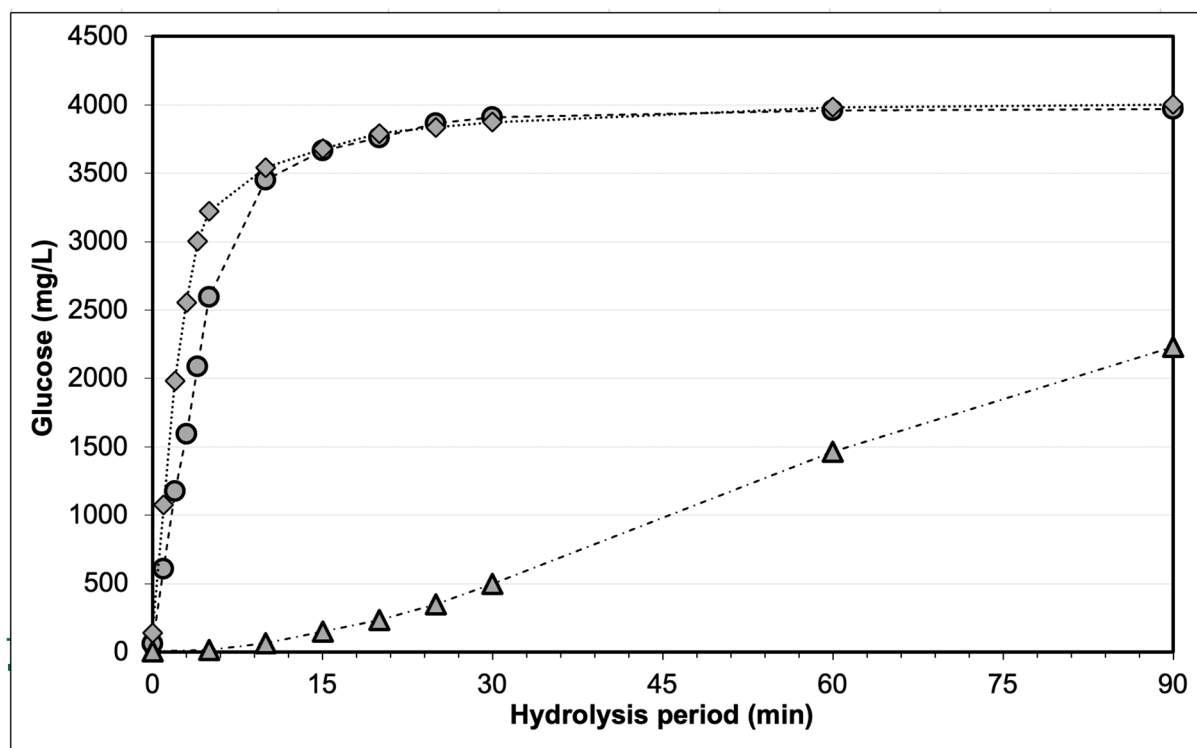

**Figure S1.** Glucose production during gelatinised corn starch hydrolysis carried out at 60 °C for 30 minutes with free (◇), released (○), and encapsulated (Δ) amyloglucosidase.
